# Supplementary material
Source: publisher site journal article supplement (https://www.dovepress.com/article/314491)
Supplement: Supplementary file 1 [file get_supplementary_file.php]

**Supplementary data file 2**

**Supplementary tables**

**Supplementary table S1.** Detailed analysis of samples with false positive and false negative detection results

**1** Patient had COVID-19 antibody test, but IgM and IgG were not detected. Patient had symptoms 10 days before PCR test was performed and COVID-19 contact before feeling the symptoms.

**2** Patient had following symptoms: febrile fever with body temperature to 38,1 °C, feeling chills, painful urination, headache.

|  | **Nasopharyngeal swab samples** | | | |
| --- | --- | --- | --- | --- |
|  |  | FAM channel | Texas RED channel |  |
| Patient code | Date of Sample Collection | ORF1ab gene, Ct | N gene, Ct | Test Result |
| BST1421 | 2020-11-02 | - | - | Negative |
| BST0832 | 2020-02-14 | 14.80 | 19.70 (Cy5) | Positive |
|  | **Saliva samples** | | | |
|  |  | FAM channel | Texas RED channel |  |
| Patient code | Date of Sample Collection | ORF1ab & S genes, Ct | RPP, Ct | Test Result |
| BST1421 | 2020-11-02 | 28.58 | 29.69 | Positive |
| BST0832 | 2021-02-15 | - | 29.74 | Negative |

**Supplementary table S2.** Viral Score value comparison by COVID-19 symptoms

|  | **Viral Score medians and quartiles in the saliva samples of subjects grouped by symptoms** | | |  |
| --- | --- | --- | --- | --- |
| **Group of symptoms** | **Asymptomatic** | **Other symptoms** | **Symptoms belonging to a specific group** | **ANOVA p-value** |
| Shortness of breath | 17,76 (16,39-18,92) | 15,55 (9,32-21,41) | 16,95 (13,44-19,41) | 0,341 |
| Fever | 17,76 (16,39-18,92) | 16,15 (9,60-20,42) | 16,96 (12,46-19,65) | 0,367 |
| Cough | 17,76 (16,39-18,92) | 15,45 (10,89-21,18) | 17,40 (12,31-19,48) | 0,383 |
| Fatigue | 17,76 (16,39-18,92) | 17,91 (9,45-20,66) | 16,15 (12,19-20,21) | 0,394 |
| Digestive dysfunction | 17,76 (16,39-18,92) | 16,65 (11,80-19,28) | 17,40 (12,05-21,41) | 0,391 |

# Supplementary figures

#
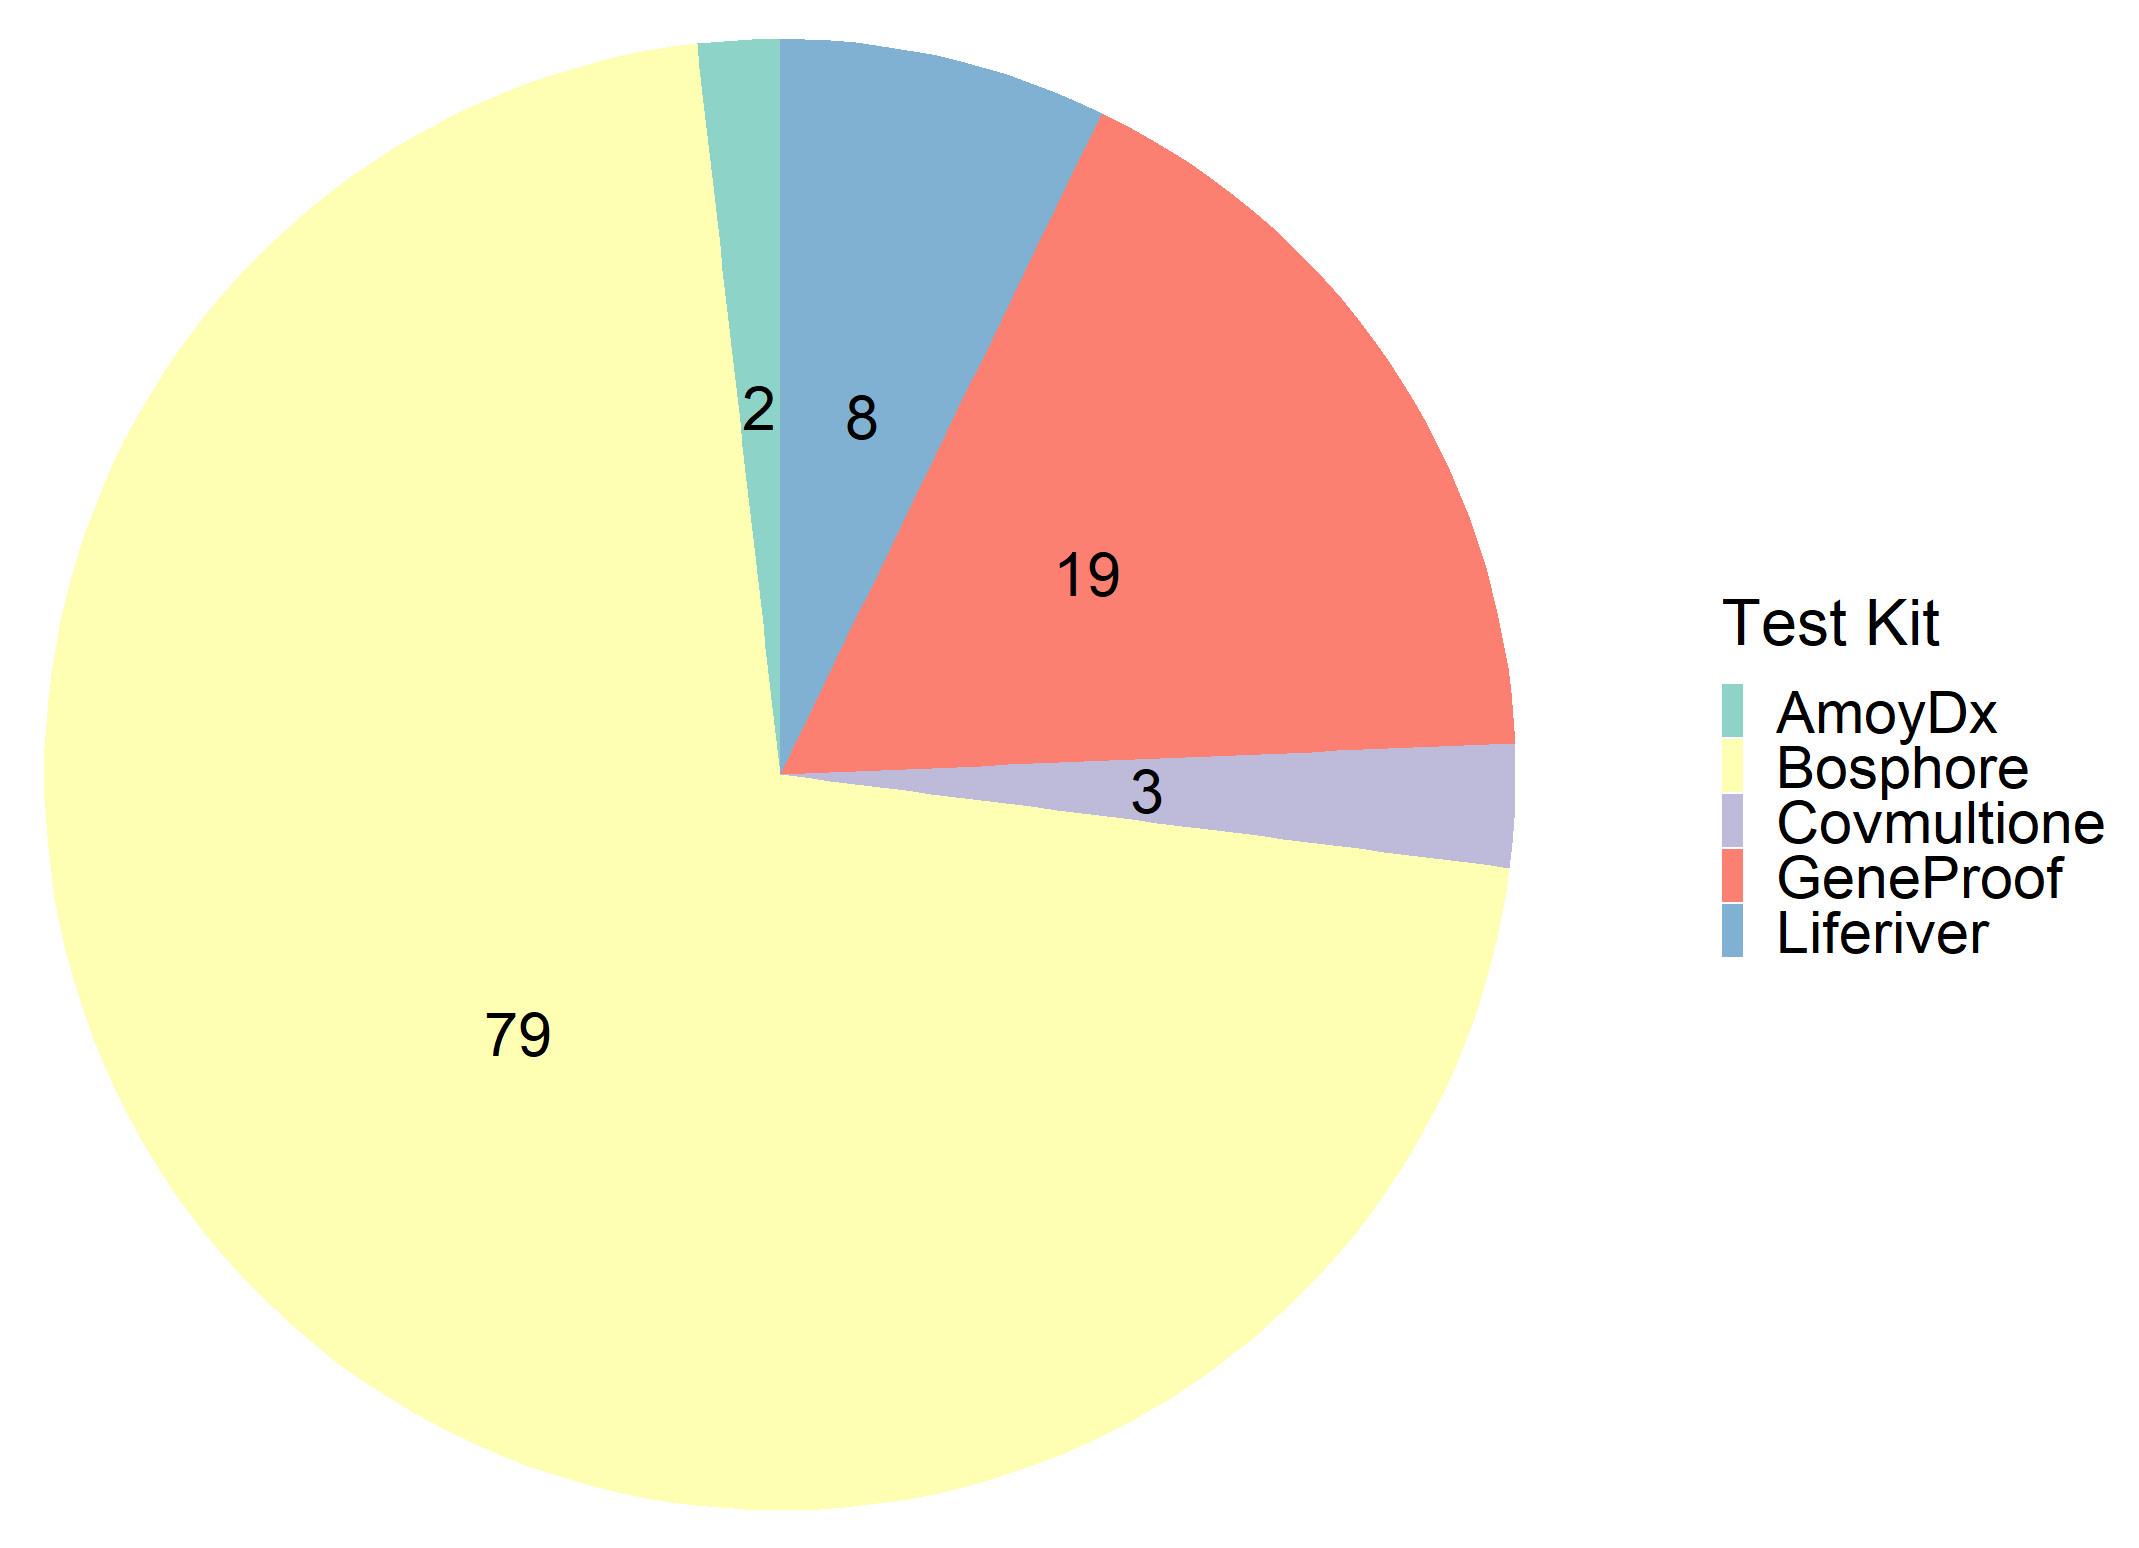


# Supplementary figure S1. Number of Tests for Nasopharyngeal Samples by Test Kit.

#
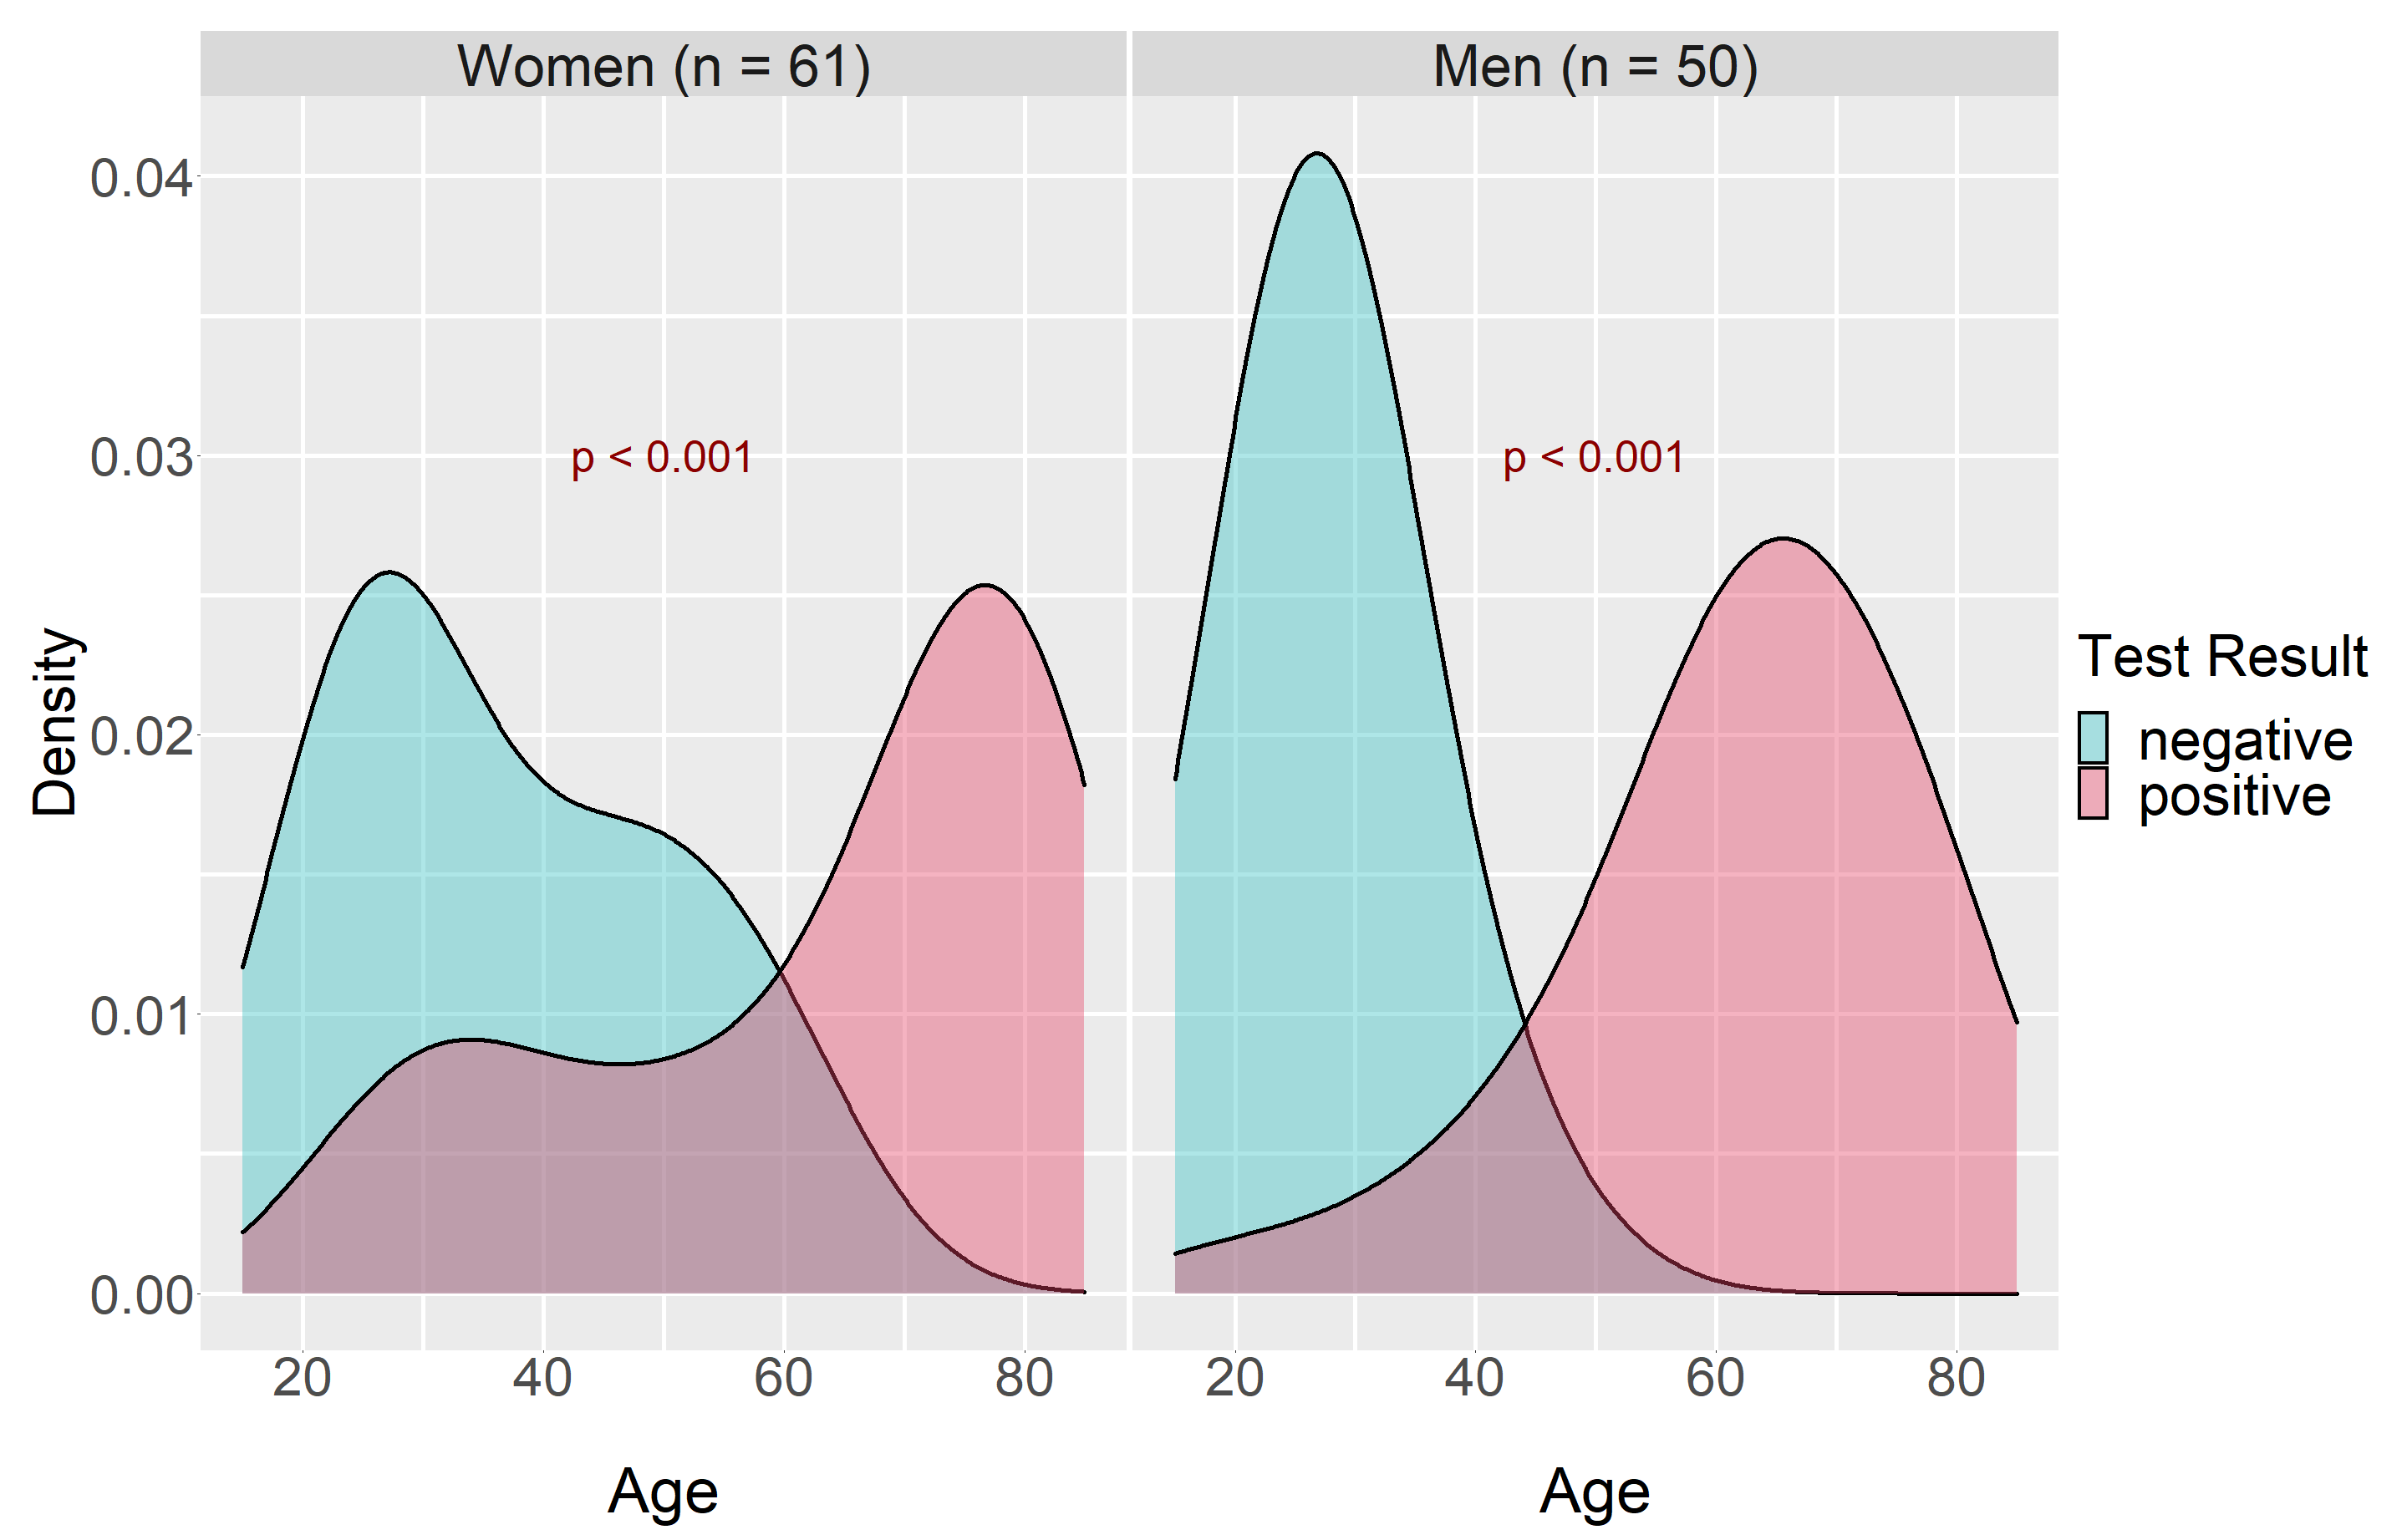


# Supplementary figure S2. Distribution of Test Result by Age and Sex.
